# Supplementary material for: Deduced Respiratory Scores on COVID-19 Patients Learning from Exertion-Induced Dyspnea
Source: MDPI journal article supplement (doi:10.3390/s23104733), 2023-05-13
Supplement: s1 [file s1]

# Supplementary Materials

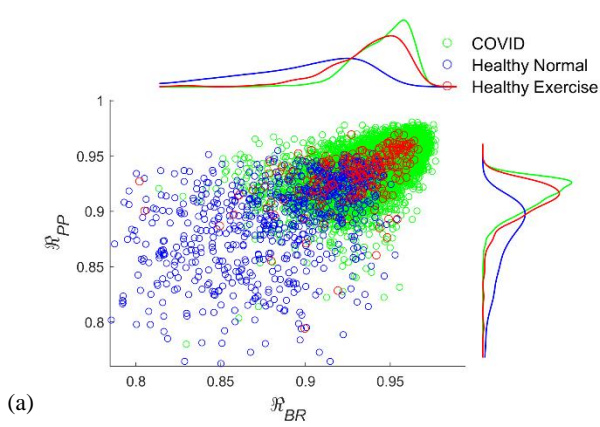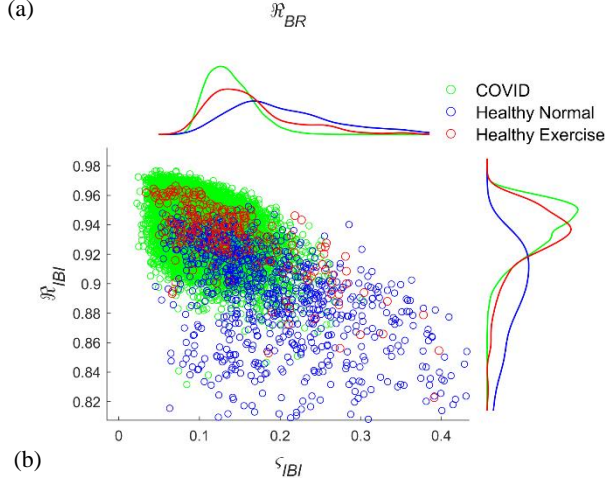

**Figure S1.** Scatter plots of sample respiratory features from COVID-19 patients (sensor: accelerometer) and healthy subjects in Exp 1 (sensor: accelerometer). Top and right lines are smoothed continuous distribution by Gaussian kernels. **(a)** Autocorrelation of breath rates vs. lung volume ( $R_{BR}$  vs.  $R_{PP}$ ); **(b)** Successive difference vs. autocorrelation of inter-breath intervals ( $z_{IBI}$  vs.  $R_{IBI}$ ).

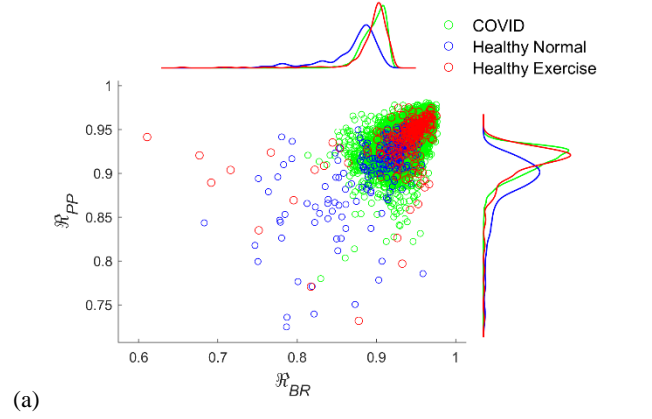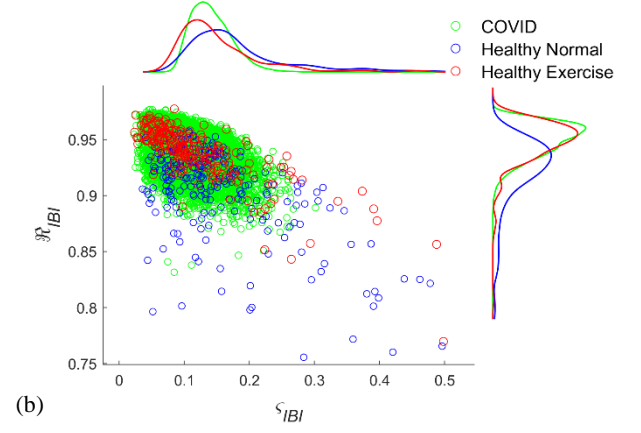

**Figure S2.** Scatter plots of sample respiratory features from COVID-19 patients (sensor: accelerometer) and healthy subjects in Exp 2 (sensor: NCS). Top and right lines are smoothed continuous distribution by Gaussian kernels. **(a)** Autocorrelation of breath rates vs. lung volume ( $R_{BR}$  vs.  $R_{PP}$ ); **(b)** Successive difference vs. autocorrelation of inter-breath intervals ( $z_{IBI}$  vs.  $R_{IBI}$ ).

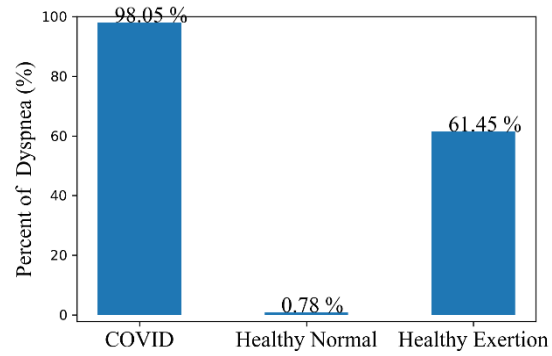

**Figure S3.** Classification results of dyspnea for COVID-19 patients (sensor: accelerometer) and healthy subjects in Exp 1 (sensor: accelerometer).

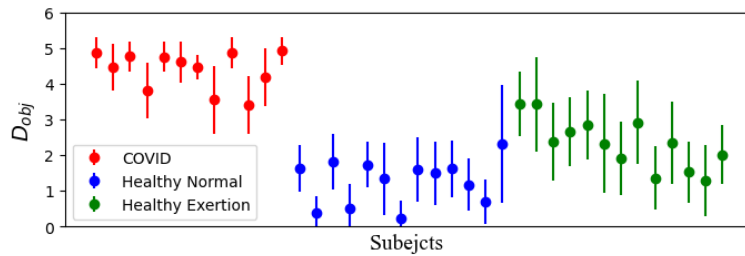

**Figure S4.** Dyspnea scoring results for COVID-19 patients and healthy subjects in Exp 1 by accelerometer sensing. Average  $D_{obj}$ : COVID = 4.39; Healthy Normal = 1.28; Healthy Exertion = 2.35.

Table S1. DEMOGRAPHIC DISTRIBUTION OF COVID-19 PATIENTS.

| Case No. | Gender<br>(Male/Female) | Height (ft) | Weight (lb) | BMI  |
|----------|-------------------------|-------------|-------------|------|
| 1        | F                       | 5' 11"      | 167         | 23.3 |
| 2        | F                       | 5' 0"       | 123         | 24.3 |
| 3        | M                       | 5' 9"       | 277         | 40.9 |
| 4        | M                       | 6' 0"       | 197         | 24.3 |
| 5        | M                       | 5' 8"       | 198         | 38.8 |
| 6        | M                       | 5' 8"       | 157         | 24.8 |
| 7        | M                       | 5' 6"       | 148         | 24.3 |
| 8        | M                       | 5' 11"      | 201         | 38.8 |
| 9        | M                       | 5' 8"       | 154         | 24.8 |
| 10       | M                       | 5' 4"       | 180         | 24.3 |
| 11       | F                       | 5' 8"       | 254         | 38.8 |
| 12       | F                       | 5' 3"       | 138         | 24.8 |

Table S2. DEMOGRAPHIC DISTRIBUTION OF HEALTHY SUBJECTS IN EXP1.

| Case No. | Gender<br>(Male/Female) | Height (ft) | Weight (lb) | BMI  | Age |
|----------|-------------------------|-------------|-------------|------|-----|
| 1        | F                       | 5' 5"       | 111         | 18.5 | 24  |
| 2        | M                       | 6'          | 135         | 18.3 | 20  |
| 3        | F                       | 5' 7"       | 180         | 28.2 | 22  |
| 4        | F                       | 5' 5"       | 130         | 21.6 | 23  |
| 5        | F                       | 5' 5"       | 100         | 16.6 | 19  |
| 6        | F                       | 5' 5"       | 140         | 23.3 | 19  |
| 7        | F                       | 5' 5"       | 120         | 20.0 | 21  |
| 8        | M                       | 5' 9"       | 165         | 24.4 | 24  |
| 9        | M                       | 6'          | 143         | 19.4 | 24  |
| 10       | M                       | 5' 11"      | 168         | 23.4 | 31  |
| 11       | M                       | 6'          | 175         | 23.7 | 23  |
| 12       | M                       | 5' 6"       | 160         | 25.8 | 59  |
| 13       | M                       | 5' 7"       | 148         | 23.2 | 25  |

TABLE S3. DEMOGRAPHIC DISTRIBUTION OF HEALTHY SUBJECTS IN EXP2.

| Case No. | Gender<br>(Male/Female) | Height<br>(ft) | Weight<br>(lb) | BMI  | Age |
|----------|-------------------------|----------------|----------------|------|-----|
| 1        | M                       | 6'             | 165            | 22.4 | 30  |
| 2        | M                       | 5' 10"         | 183            | 26.3 | 32  |
| 3        | M                       | 6' 5"          | 209            | 24.8 | 25  |
| 4        | M                       | 5' 7"          | 158            | 24.7 | 58  |
| 5        | M                       | 5' 7"          | 143            | 22.4 | 22  |
| 6        | F                       | 5' 5"          | 119            | 19.8 | 24  |
| 7        | M                       | 5' 10"         | 132            | 18.9 | 31  |
| 8        | F                       | 5' 6"          | 132            | 21.3 | 27  |
| 9        | F                       | 5' 4"          | 121            | 20.8 | 22  |
| 10       | M                       | 5' 10"         | 172            | 24.7 | 30  |
| 11       | M                       | 5' 10"         | 154            | 22.1 | 24  |
| 12       | F                       | 5' 5"          | 114            | 19.0 | 25  |
| 13       | F                       | 5' 4"          | 108            | 18.5 | 25  |
| 14       | F                       | 5' 4"          | 115            | 19.7 | 24  |
| 15       | M                       | 5' 7"          | 161            | 25.2 | 26  |
| 16       | M                       | 5' 10"         | 172            | 24.7 | 23  |
| 17       | F                       | 5' 5"          | 112            | 18.6 | 24  |
| 18       | F                       | 5' 3"          | 115            | 20.4 | 24  |
| 19       | F                       | 5' 8"          | 143            | 21.7 | 23  |
| 20       | M                       | 5' 10"         | 174            | 25.0 | 23  |
| 21       | M                       | 5' 10"         | 176            | 25.3 | 25  |
| 22       | M                       | 6'             | 125            | 17.0 | 18  |
| 23       | F                       | 5' 5"          | 112            | 18.6 | 26  |

|    |   |       |     |      |    |
|----|---|-------|-----|------|----|
| 24 | F | 5' 5" | 132 | 22.0 | 28 |
| 25 | F | 5' 5" | 108 | 18.0 | 26 |
| 26 | F | 5'    | 101 | 19.7 | 27 |
| 27 | F | 5' 5" | 125 | 20.8 | 28 |
| 28 | F | 5' 4" | 115 | 19.7 | 22 |
| 29 | M | 5' 8" | 145 | 22.0 | 20 |
| 30 | F | 5' 5" | 121 | 20.1 | 24 |
| 31 | F | 5' 5" | 110 | 18.3 | 25 |
| 32 | F | 5' 8" | 143 | 21.7 | 20 |

Table S4. REPORTED DYSPNEA AT REST OF COVID-19 PATIENTS AT STUDY ADMISSION.

| Case No. | Dyspnea at rest<br>(beginning of recording) |
|----------|---------------------------------------------|
| 1        | YES - significant                           |
| 2        | NO                                          |
| 3        | Yes - mild                                  |
| 4        | YES - significant                           |
| 5        | NO                                          |
| 6        | Yes - moderate                              |
| 7        | Yes - mild                                  |
| 8        | YES - significant                           |
| 9        | YES - significant                           |
| 10       | Yes - mild                                  |
| 11       | Yes - mild                                  |
| 12       | YES - significant                           |
